# Supplementary material
Source: PubMed Central journal article supplement (PMC4574741)

Supplemental Figure 1:

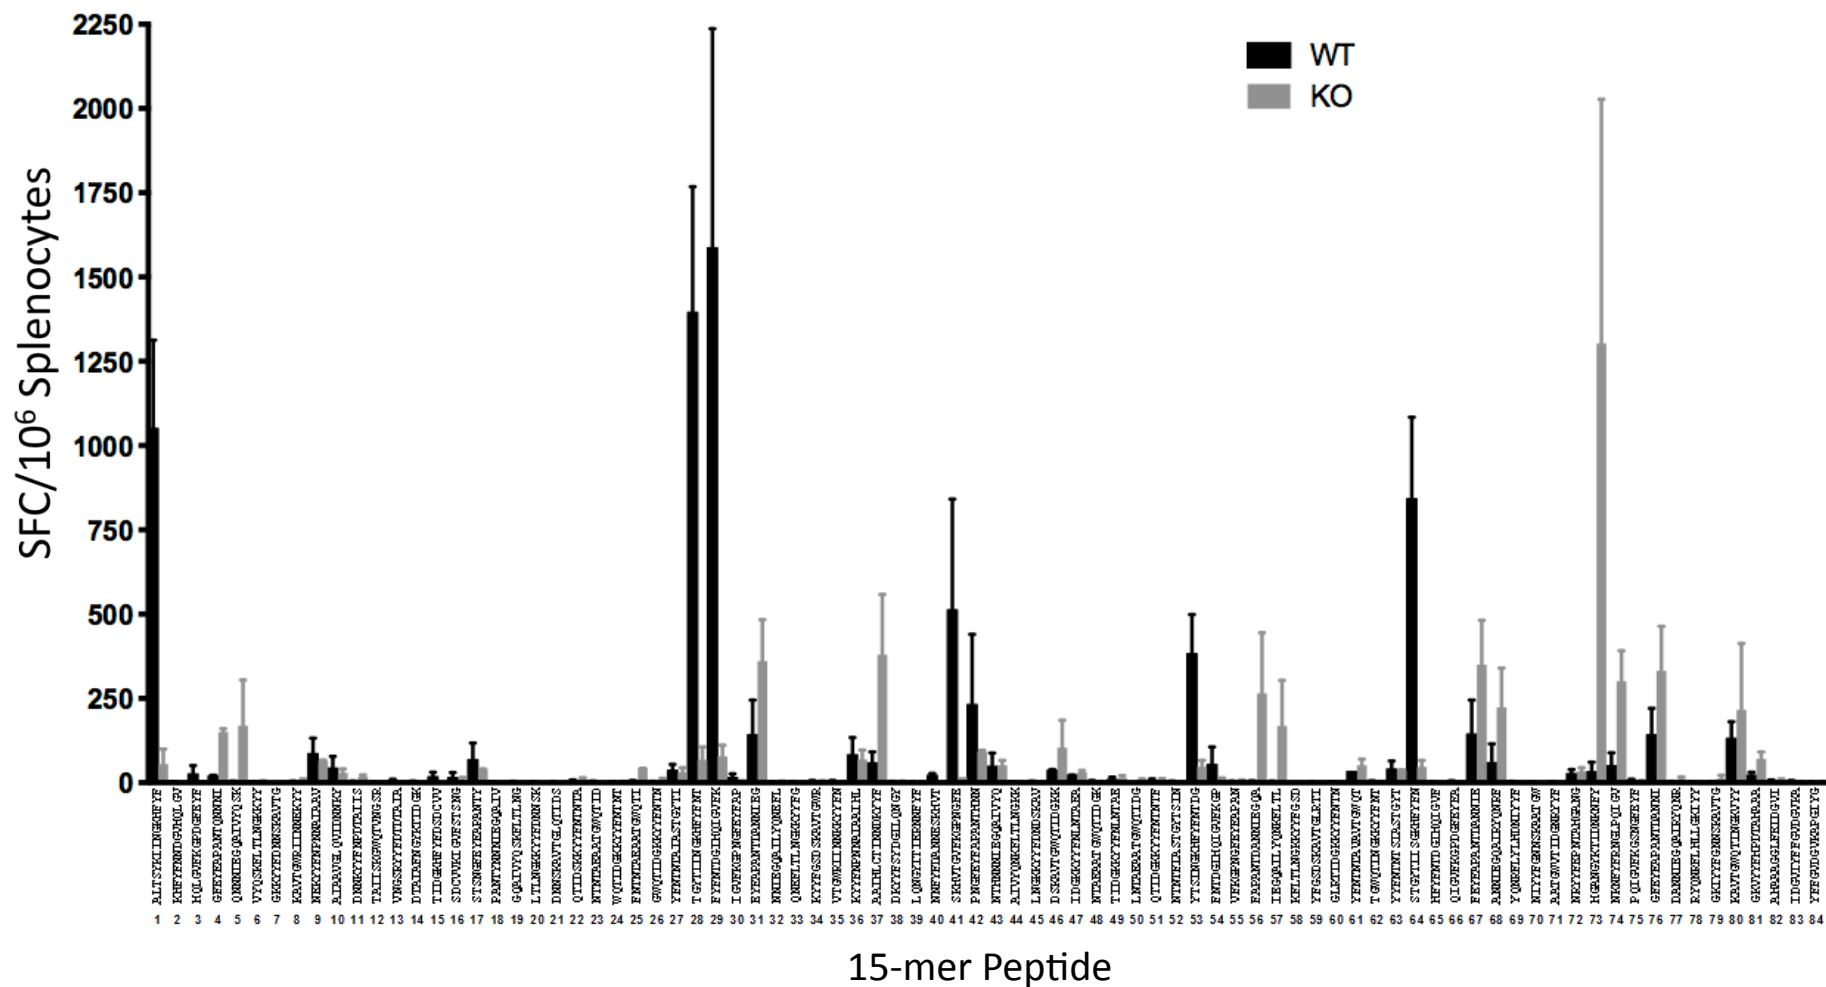

Supplement: supp_dxu078_SupplimentalFigure1.pdf [file supp_dxu078_SupplimentalFigure1.pdf]
